# Supplementary material for: mHealth Impact on Gait and Dynamic Balance Outcomes in Neurorehabilitation: Systematic Review and Meta-analysis
Source: Springer Nature journal article supplement (doi:10.1007/s10916-023-01963-y), 2023-07-18
Supplement: MOESM2 [file 25817056]

| <b>Online resource 2. Complete search strategy</b> |                                                                                                                                                             |
|----------------------------------------------------|-------------------------------------------------------------------------------------------------------------------------------------------------------------|
| <b>#1</b>                                          | Search (“neurolog*” [Mesh] OR neurologia OR neurologic OR neurological OR neurologically OR neurologist OR neurologists OR neurology)                       |
| <b>#2</b>                                          | Search (“smartphone” OR “mobile” OR “mhealth” OR “m-health”)                                                                                                |
| <b>#3</b>                                          | Search (“randomized controlled trial” OR “controlled trial” OR “randomized clinical trial” OR “randomised controlled trial” OR “randomised clinical trial”) |
| <b>#5</b>                                          | Search (#1 AND #2 AND #3)                                                                                                                                   |
