# Supplementary material for: mHealth Impact on Gait and Dynamic Balance Outcomes in Neurorehabilitation: Systematic Review and Meta-analysis
Source: Springer Nature journal article supplement (doi:10.1007/s10916-023-01963-y), 2023-07-18
Supplement: MOESM3 [file 25817056]

**Online resource 3.** PEDro scale score for clinical trials included in the review.

| <b>Studies</b>                                                                        | <b>Score</b> | <b>Methodology quality</b> | <b>1</b> | <b>2</b> | <b>3</b> | <b>4</b> | <b>5</b> | <b>6</b> | <b>7</b> | <b>8</b> | <b>9</b> | <b>10</b> | <b>11</b> |
|---------------------------------------------------------------------------------------|--------------|----------------------------|----------|----------|----------|----------|----------|----------|----------|----------|----------|-----------|-----------|
| Ginis et al., 2015                                                                    | 6            | Good                       | -        | 1        | 0        | 1        | 0        | 0        | 0        | 1        | 1        | 1         | 1         |
| Kim et al., 2012                                                                      | 5            | Acceptable                 | -        | 1        | 0        | 1        | 0        | 0        | 0        | 1        | 0        | 1         | 1         |
| Ellis et al., 2018                                                                    | 7            | Good                       | -        | 1        | 1        | 1        | 0        | 0        | 1        | 1        | 0        | 1         | 1         |
| Plow & Golding., 2017                                                                 | 6            | Good                       | -        | 1        | 1        | 0        | 0        | 0        | 1        | 1        | 0        | 1         | 1         |
| Grau-Pellicer et al., 2019                                                            | 4            | Acceptable                 | -        | 1        | 0        | 1        | 0        | 0        | 0        | 0        | 0        | 1         | 1         |
| Lee et al., 2017                                                                      | 6            | Good                       | -        | 1        | 0        | 1        | 0        | 0        | 1        | 1        | 0        | 1         | 1         |
| Shin & Song., 2016                                                                    | 6            | Good                       | -        | 1        | 0        | 0        | 1        | 0        | 1        | 1        | 0        | 1         | 1         |
| Nasseri et al., 2020                                                                  | 8            | Good                       | -        | 1        | 1        | 1        | 0        | 0        | 1        | 1        | 1        | 1         | 1         |
| Asano et al., 2021                                                                    | 7            | Good                       | -        | 1        | 1        | 1        | 0        | 0        | 1        | 0        | 1        | 1         | 1         |
| Li et al., 2020                                                                       | 7            | Good                       | -        | 1        | 0        | 1        | 0        | 0        | 1        | 1        | 1        | 1         | 1         |
| Hankinson et al., 2022                                                                | 3            | Poor                       | -        | 1        | 1        | 0        | 0        | 0        | 1        | 0        | 0        | 0         | 0         |
| Salgueiro et al., 2022                                                                | 8            | Good                       | -        | 1        | 1        | 1        | 0        | 0        | 1        | 1        | 1        | 1         | 1         |
| Aphiphaksakul et Siriphorn, 2022                                                      | 8            | Good                       | -        | 1        | 1        | 1        | 0        | 0        | 1        | 1        | 1        | 1         | 1         |
| Ranged 0-10. Item 1 is related to external validity and not used in the method score. |              |                            |          |          |          |          |          |          |          |          |          |           |           |
