# Supplementary material for: mHealth Impact on Gait and Dynamic Balance Outcomes in Neurorehabilitation: Systematic Review and Meta-analysis
Source: Springer Nature journal article supplement (doi:10.1007/s10916-023-01963-y), 2023-07-18
Supplement: MOESM4 [file 25817056]

**Online Resource 4.** Risk of bias of studies included in the systematic review.

| Study                            | Risk of bias domains |    |    |    |    | Overall |
|----------------------------------|----------------------|----|----|----|----|---------|
|                                  | D1                   | D2 | D3 | D4 | D5 |         |
| Asano et al., 2021               | +                    | +  | -  | +  | +  | -       |
| Ellis et al., 2018               | +                    | +  | +  | +  | +  | +       |
| Ginis et al., 2016               | +                    | +  | +  | -  | +  | -       |
| Grau-Pellicer et al., 2019       | -                    | -  | +  | -  | +  | X       |
| Kim et al., 2012                 | -                    | -  | +  | -  | +  | X       |
| Lee et al., 2017                 | +                    | +  | +  | +  | +  | +       |
| Li et al., 2020                  | -                    | +  | +  | +  | +  | -       |
| Nasseri et al., 2020             | +                    | +  | +  | +  | +  | +       |
| Plow & Golding., 2017            | -                    | +  | +  | +  | +  | -       |
| Shin & Song., 2016               | -                    | -  | +  | +  | +  | -       |
| Hankinsonson et al., 2022        | -                    | -  | X  | +  | -  | X       |
| Salgueiro et al., 2022           | +                    | +  | +  | +  | +  | +       |
| Aphiphaksakul et Siriphorn, 2022 | +                    | +  | +  | +  | +  | +       |

Domains:  
D1: Bias arising from the randomization process.  
D2: Bias due to deviations from intended intervention.  
D3: Bias due to missing outcome data.  
D4: Bias in measurement of the outcome.  
D5: Bias in selection of the reported result.

Judgement  
 High  
 Some concerns  
 Low
